# Supplementary material
Source: Springer Nature journal article supplement (https://www.springermedizin.de/resource/supplementary/12911_2013_815_MOESM5_ESM.pdf/9526722)

Patients without cancer recurrence

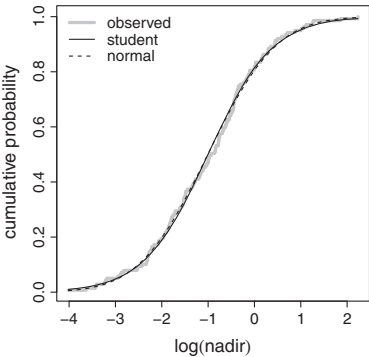

Patients with cancer recurrence

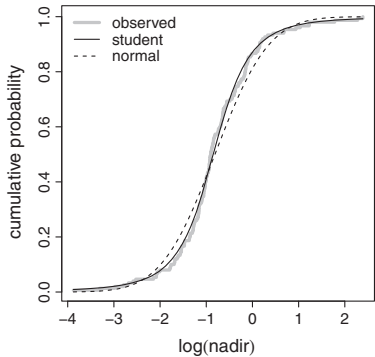

Supplement: MOESM5 [file 9526722]
